# Supplementary material for: Topoisomerase I Plays a Critical Role in Suppressing Genome Instability at a Highly Transcribed G-Quadruplex-Forming Sequence
Source: PubMed Central journal article supplement (PMC4256205; doi:10.1371/journal.pgen.1004839), 2014-12-04

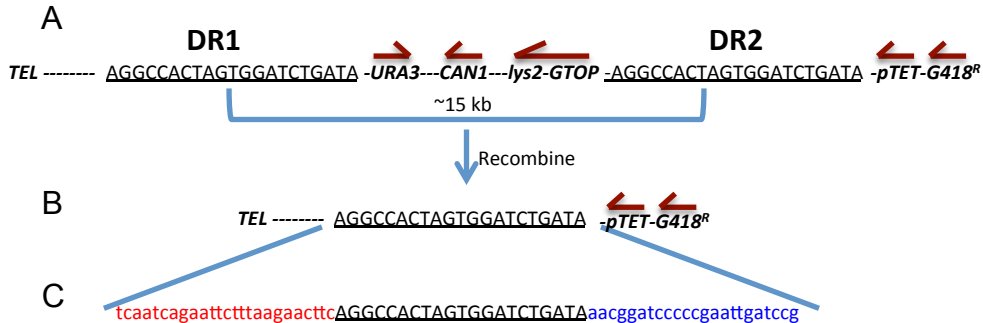

Supplement: pgen.1004839.s003.pdf [file pgen.1004839.s003.pdf]
